# Supplementary material for: Structural and Functional Characterization of New SsoPox Variant Points to the Dimer Interface as a Driver for the Increase in Promiscuous Paraoxonase Activity
Source: MDPI journal article supplement (doi:10.3390/ijms21051683), 2020-03-01
Supplement: s1 [file s1]

# Supporting Information

## Structural and Functional Characterization of New Ssopox Variant Points to the Dimer Interface as a Driver for the Increase in Promiscuous Paraoxonase Activity

Yoko Suzumoto <sup>1</sup>, Orly Dym <sup>2</sup>, Giovanni N Roviello <sup>3</sup>, Franz Worek <sup>4</sup>, Joel L Sussman <sup>2</sup> and Giuseppe Manco <sup>1,\*</sup>

<sup>1</sup> Institute of Biochemistry and Cell Biology, CNR, 80131 Naples, Italy

<sup>2</sup> The Weizmann Institute of Science, Rehovot, Israel

<sup>3</sup> Institute of Biostructures and Bioimages, CNR, 80131 Naples, Italy

<sup>4</sup> Bundeswehr Institute of Pharmacology and Toxicology, Munich, Germany

\* Correspondence: Giuseppe Manco<sup>1</sup> Institute of Biochemistry and Cellular Biology, CNR, 80131 Naples, Italy

|            |                                                                                                        |
|------------|--------------------------------------------------------------------------------------------------------|
| SsoPox3Mut | ATGAGAA-TA--CCA--TTAGTTGGGAAAGATTCAATAGAATCTAAGGACATAGGATTTACGCTAATTCATGAACATTTAAGAGT-TTTTAGCGAA----   |
| SisLac     | ATGAGAA-TA--CCA--TTAGTTGGGAAAGAGCCAAATAGAAGCTGAGGATATGGGATTTACGCTGATTCATGAACATTTAAGAGT-TTTTAGTGAA----  |
| SacPox     | ATGACAAAAATTCTCT--CTTGAGGAAAAGGTGAAATATCACCTGGAGAAATGGGTTTACTTTAATACATGAGCATTTAAGGGT-CTTCAGTGAA----    |
| VmoLac     | ATGGTACGCA--TCAGCATCGTGGTGGAAACGAAATGTATCCGGGTAGTATGGGTTAACCCCTGTTTCATGAGCATTTACGCCCT-GATCACCAGAA----  |
| GKL        | ATGGCGGAGA--TGGTAGAAACGGTATGCGGGCGGTCGCGGTGGAAACAGCTTGGCAAACGCTCATCCACGAGCATTTCTCTTCGGTTATCCAGGGTT     |
| Dr0930     | ATGACGG-CA-----CA--GACGGTGACGGCGCAGTCGCGGCGCTCAACTCGGAGCGAGCTGCCCAACGAACACGTGATTTTCGGTACCCCGGCTA       |
|            | *** * * * * * * * * * * * * * * * *                                                                    |
| SsoPox3Mut | GCGGTCAGACAACAATGGCCCCATCTATATAACGAAGATGAGGAGTTCAG-AAACGCTGTAATGAGGTTAAAAGGGCAATGCAATTTGGAGTAAAGACT    |
| SisLac     | GCAGTCAGATATCAATGGCCTCATTGTACAATGAAGATGAGGAGTTAAG-AAACGCTGTAATGAGGTTAAAAGGGCTATGCAATTTGGAGTAAAGACT     |
| SacPox     | CCAGTTAGATATCAATGGCCACATCTTTATAATGAAGATGAGGAGTTAAA-AAATCGAGTAAATGAAGTAAAGACAATAATGTCATATGGTGTAAAGACC   |
| VmoLac     | ATCGGTGATCCCACTGTCA-TGGGTTAGGGAGAGACATTAGATTCAGTG                                                      |
| GKL        | ATCATCGACTTGAACCTGTGCTGGGATTG-GCTGTGACGTTCGCTTTAACG                                                    |
| Dr0930     | TTGTCGATCCGAGCCGA-ACGATTTGCGGGCGCAACCCGGCTTTTTCG                                                       |
|            | CGCGGGCGAGTGCAG--CTCGGGCCATTGCACCACGCGCAGCGCTCGCAAGCTGCA-CCGAAACGGCGCGGCTGCTGGCGCGCGGTATTTCAGACG       |
|            | * * * * * * * * * * * * * * * * *                                                                      |
| SsoPox3Mut | ATAGTAGATCCCAGTGTAA-TGGGATTGGGTAGGGACATCAGATTTATG                                                      |
| SisLac     | ATAGTGGATCCCTACAGTAA-TGGGATTGGGAAGGGACATTAGATTTATG                                                     |
| SacPox     | ATCGGTGATCCCACTGTCA-TGGGTTAGGGAGAGACATTAGATTCAGTG                                                      |
| VmoLac     | ATCATCGACTTGAACCTGTGCTGGGATTG-GCTGTGACGTTCGCTTTAACG                                                    |
| GKL        | TTGTCGATCCGAGCCGA-ACGATTTGCGGGCGCAACCCGGCTTTTTCG                                                       |
| Dr0930     | GTGGTGAGCCACCCCA-ACGACTGCGGACGCAACCCGGCTTCCTCG                                                         |
|            | * * * * * * * * * * * * * * * * *                                                                      |
| SsoPox3Mut | TTAC-ATATATATCGAC---TTACCTTCTATTCTTAAATAGG-----TCAATTGATGAGATAGCTGACTTGTTTATTATCATGATATA               |
| SisLac     | TTAC-ATATACGTTGAC---TTACCTTCTATTCTTAAATAGG-----TCAATTGATGAGATAGCTGACCTATTTATTACAGATATA                 |
| SacPox     | GTAT-ACCTACACTGAT---TTACCTTCTTCTTCAATGGAAGA-----TCATTGGAAGAGATTGCAAGAAATTATTAATACATGATATA              |
| VmoLac     | TTAC-ACGTATACCGAA---ATTCCGTTTACTTCAAGAATCGT-----GGGATTGACTCGTTAGTCGATGCCTTTGTACACGATATT                |
| GKL        | TTATTATGAA--GGGGAAGGGGCGCGCGCTACTTCCAATTCCGCGCGGTTCTC-GGAACA-GCAGAAGATGACATTTACGACATGTTTATGGCCGAGCTG   |
| Dr0930     | TTATTACGAG-GGCGAGGGGCCACGACCTACTTCAAGTTCCGC--GCTTCTCTGGGTGACGCCGAAAGCGAAATCTACGAGATGATGCGGACCGAGGTG    |
|            | ** * * * * * * * * * * * * * * * *                                                                     |
| SsoPox3Mut | AAAGAGGGAATACAAAGTACTCTCAATAAAGCTGGCTTCGTAAGATAGCT-GCAGATGAACCTGGGATCACAAGGATGTGGAGAAGGTAATAAGGGCT     |
| SisLac     | AAAGAGGGAATACAGGCTACTTCCAATAAAGGCTGGCTTCGTAAGATAGCT-GCAGACGAGCCAGGCATTACTAAAGATGTGGAGAAGGTAATAAGAGCA   |
| SacPox     | AAAAAGGGGAATACAAAGGACAATAATAGAGCAGCATTTCAATTAAAGGTTGCA-GCAGATGAGCCAGGTATAACGAGGATGTAGAGAGGGCAATAAGGGCA |
| VmoLac     | ACCATTTGGCATTAAGGCACCAATACTCGCGCAGCATTCGTGAAAGCCGTA-ATCGATTCACGCGGCTGACGAAAGACGCTGGAAATGGCAATTCGTGCA   |
| GKL        | ACCGAGGGCATTGCCGATACCCGGAATCAAGGCGGGTGTCTCAAGCTGCC-TCGAGCAAAGGGCGCATCCGAGGTACAAAAGATGTTCTTCGCGGCC      |
| Dr0930     | ACCGAGGGCATCGCGGCACCGGCATCCGCGCGGGGTCTCAAGCTGGCGAGCAGCCGCA-CGCGCATACCCCTACGAGCAATGTTTTCCGGGGC          |
|            | * * * * * * * * * * * * * * * * *                                                                      |
| SsoPox3Mut | GCTGCCATAGCAACAAAGAGACTAAAGTACCAATAATTACCACTCTAACGCTCACAATAACACCGGATTAGAACAGCAAGAATAATTGACTGAAGAAG     |
| SisLac     | GCAGCTATAACCCATAAGGAGGCTAAAGTACCTATAAATTACGCACTTCTAATGCTCACAATAACACTGGATTAGAAGAACAGAGAAATTAATGGAAGAAG  |
| SacPox     | GCTGCTATAGCTCAGAAGGAGACTAACGTACCCATAAATACACATCTCAATAGTCTATAACGGGACAGGCTTGAAGCAACAAAGGATCTTAATGAGGAGG   |
| VmoLac     | GCCCGCAAAGCGCACATCAAGACGGATGTGCCCATCATTAACCACTCTTTCGTTGGCAATAAGAGCTCTCTGGATCTGATTTCGCATTTTCAAAGAAGAAG  |
| GKL        | GCCGCCCGCGCGCAAAAGAGAGCGGGCGCGGTCTATCATCACCATACGCAAGAAG-AACG--ATGGGGCGGAAACAGCCGCCTATTGTCTGAGCAGC      |
| Dr0930     | GCGGCGCGGTGACGCGCAAAACCGCGTGCAGTATCACTACCCACACTAGGAAGGCCAGC--A-GGGACCGCAGCAAGCCGAGCTGCTGACCTCGCTCG     |
|            | ** * * * * * * * * * * * * * * * *                                                                     |
| SsoPox3Mut | GTGTTGATCCAGGGAATAATTAATAGGTCATTTAGGTGATACAGATAAATATAGATTAC-ATAAGAAGATAGCAGATAAAGGATCCTTTATGGATTAG     |
| SisLac     | GTTTGTATCCAGGAAGATATTGATAGGACATTTGGGGGACACTGATAATACGGATTAT-ATAAGAAGATAGCAGATAAAGGATCCTTTATCGGATTAG     |
| SacPox     | GTGTAGACCCAGGGAGAGTGCTAATAGGTCACCTTGGGGGACACTGATAACGTGGATTAC-ATAAGAAGATAGCCGATAAAGGCTCCTTTGTAGGTCTAG   |
| VmoLac     | GGGTGGATTGGCTCGTACCGTGATTGGCCATGTTGGCGATACAGACGACATCTCCTTC-ATTGAACAGATTCTGCGCGAAGGAGCCTTTATCGGACTTG    |
| GKL        | GCGCCGATCCGAAAAAAATGTGATCGGCCATATGTGCGGCAACACGGACCCGGACTATCATC-GAAAGACGCTTGCTTACGGCGTTTACATTGCGGTTTG   |
| Dr0930     | GCGCGGACCGCGCGCATCATGATCGGGCAGATGGAGCGCAACCCGCGCTACCACC-GCGAGACGCTGCGCCACGGCGTGAGCATGCCTTTTG           |
|            | * * * * * * * * * * * * * * * * *                                                                      |
| SsoPox3Mut | ATAGATATGGTTTA---GATTTATT---CTTACCTGTTGATA---AGAGAAATGAAACGACCTTAAGACTAATCAAAGATGGTTATTACAGATAAGATAAT  |
| SisLac     | ATAGATATGGTTTA---GATTTGTT---CTTACCACTGTTGATA---AGAGAAATGAAACAACATTTGAACTAATCAAGGATGGTTACTCTGATAGGATAAT |
| SacPox     | ATAGATACGGTCTA---GATCTATT---CTTACCTATAGATA---AAAGGAACGAGGTGTTGTTGAAATTAATTAAGATGGATACTTGGACAGGATTAT    |
| VmoLac     | ATCCGCTTTGGCGCTG---GACATTTA---TCTGCGCTGAGATA---AACCGGTGAAACCTGCGATTGAGCTGATCAACACGTGGTTGGATTGACAGCTTAT |
| GKL        | ACCGCTTTCGGCATCCAAAGGATGTGTCGGCGCGCAGGATGAGGAGCGGGTCGCGAGCGCTCTTGTCTGCTCCGCGATGGGTACGAAACAAATTTAT      |
| Dr0930     | ACCCATCTGGCTTTCAGGGCATGGTGGGCACCCACCGACGCGGAGCGGCTAAGCGTGCTGACCACTGCTGCTGCGGAGGGGCTACGCGACCGGCTGCT     |
|            | * * * * * * * * * * * * * * * * *                                                                      |
| SsoPox3Mut | GATCTCTCAGCATATTATATGACATTCGACGCTGG-AAC---TGCAAAACAGAAATATAAACCTAAGCTTGC-TCCAAGA-TGGAGTATAACTCTAAT     |
| SisLac     | GATTTGCATGACTATTGTTGCACAATTGACTGGG-GAC---TGCTAGACAGAGCTTAAACCTAAACTCGC-TCCAAGA-TGGAGTATGGCACTAAT       |
| SacPox     | GGTGTCACAAGATTACTGTTGCACAATTGACTGGG-GAT---AGCAAAAGCCGAGTACAAACCTAAACTAGC-TCCAAGA-TGGAGTATGAGTTTAAT     |
| VmoLac     | GTTGTGCGATGACTATTGCCCGACAATTGATTGGTA-TCC-----TCCGGAAGTTGTACGTTCAACCGT-CCCGGAT-TGGACAATGAGCGCTGAT       |
| GKL        | GCTGTGCGATGACAC-TG-TCAACGTTTGCGCTCGTCCGTTTACGCTGCCGGAACCGTTTGCGGAAATGA--TGAAAAATTGGCATGTGACGACATTT     |
| Dr0930     | GCTCTCGACGACAG-CATCTGGC-ACTGGCTGGGACGCGCGCGGCGCATCCCGGAAGCC--GCCTTGCGCGCGCTCAAGGACTGGCACCTCTCCACAT     |
|            | * * * * * * * * * * * * * * * * *                                                                      |
| SsoPox3Mut | ATTTGAGGATACGATACCGTTCTTAAAGAGAAATGGAGTGAATGAAGAGTTATAGCTACAATATTTAAGGAAAAATCCGAAAAAGTTCTTC-----AG-    |
| SisLac     | ATTTGAGGATACCATACCGTTCTTAAAGAAAAATGGAGTGAATGAAGAGTTATAGATATAAATATTCAGGAGAAATCCGAAAAAATCTTC-----AG-     |
| SacPox     | ATTTACAGACGTTATACCTCAATTAAGAGAGCAGGAGTAACGTGATGAGCAGTTGCATGTAATCTTCGTAAGAAATCCAGCTAGACTATTT-----AG-    |
| VmoLac     | CTTCGAGAAAGTATCTCTCGCATGCGGAGTGAAGTATTACCGAGGAACAGATTAAACCGGGTTCTCATCGATAACCCACGCGCTGTGTTTACTGGCCG-    |
| GKL        | GTTTGTGAACATCATCCCGCGCTGAAAAATGAAGGAATCCGCGACGAAGTGCTTGAGCAAAATGTTTCATCGGCAATCCGGCGGCGCTGTTCC--TC--GGC |
| Dr0930     | CTCCGACGACATCTTGCTGATCTCGGGCGCGGGGCATCACCGAGGAGCAGTGGGGCAGATGACGGTGGCAACCGGCGCGGCTGTTC-----GG-         |
|            | * * * * * * * * * * * * * * * * *                                                                      |
| SsoPox3Mut | CTAA                                                                                                   |
| SisLac     | CTAA                                                                                                   |
| SacPox     | TTAG                                                                                                   |
| VmoLac     | TTAA                                                                                                   |
| GKL        | TTGA                                                                                                   |
| Dr0930     | GTAA                                                                                                   |
|            | *                                                                                                      |

**Figure S1.** Multiple sequence alignment of 6 homologous PLL genes utilized in this study by CLUSTAL W 1.83. Conserved nucleotides are marked by asterisk. The gene encoding *vmolac* was optimized for the expression in *E. coli* and cloned into vector pEX-A2 by Eurofins Genomics, Germany.

|                   |     |                                                                       |
|-------------------|-----|-----------------------------------------------------------------------|
| <i>SsoPox3Mut</i> | 1   | --MRIPLVGKDSIESKDIGFTLIHEHLRVFSEAVRQQWPHLY-NEDEEFNAVNEVKRAMQFGVKTI    |
| <i>SisLac</i>     | 1   | --MRIPLVGKEPIEAEDMGFTLIHEHLRVFSEAVRYQWPHLY-NEDEELNAVNEVKRAMQFGVKTI    |
| <i>SacPox</i>     | 1   | -MTKIPLVGKGEISPGEIMGFTLIHEHLRVFSEPVRYQWPHLY-NEDEELKNAVNEVKTIMSYGVKTI  |
| <i>VmoLac</i>     | 1   | -MVRISIAAGNEIDPGSMGLTLFHEHLRLITEVVRWNWPHLY-NEDEELKRAIDAVNAKKYGVKTI    |
| <i>GKL</i>        | 1   | MAEMVETVC-GPVPEQLGKTLIHEHFLFGYPGFQGDVTRGTFREDESLRVAVEAAEKMKRHGIQTV    |
| <i>Dr0930</i>     | 1   | --MTAQTVT-GAVAAQLGATLPEHVIFGYPGYAGDVTLGPFDAHAALASCTETARALLARGIQTV     |
|                   |     | . * * * * *                                                           |
| <i>SsoPox3Mut</i> | 65  | VDPTVMGLGRDIRFMEKVVKATGINLVAGTGIYIYI-DLPFYFLNRS-----IDEIADLFIHDIK     |
| <i>SisLac</i>     | 65  | VDPTVMGLGRDIRFMEKVVKTTGINLVAGTGIYIYV-DLPFYFLNRS-----IDEIADLFIHDIK     |
| <i>SacPox</i>     | 66  | VDPTVMGLGRDIRFSEKVVKETGINVIAATGLYTYT-DLPFFFNGRS-----LEEIAELLIHDIK     |
| <i>VmoLac</i>     | 66  | IDLTVAGIGCDVRFNEKVAKATGVNIIMGTGFYTYTE-IPFYFKNRG-----IDSLVDAFVHDIT     |
| <i>GKL</i>        | 67  | VDPTPNDCGRNPAFLRRVAEETGLNIICATGYYYEGEGAPPYFQFRRLGTAEDDIYDMFMAELT      |
| <i>Dr0930</i>     | 65  | VDATPNDCGRNPAFLREVSEATGLQILCATGFYYEGEGATTYFKFRASLGDAESEIYEMMRTEVT     |
|                   |     | . * * * * * . * . . . .                                               |
| <i>SsoPox3Mut</i> | 124 | EGIQGTLNKAGFVKIAADEPGITKDVEKVIIRAAAIANKETKVPIITHSNAHNNTGLEQQRIILTEE   |
| <i>SisLac</i>     | 124 | EGIQATSNKAGFVKIAADEPGITKDVEKVIIRAAAIHKEAKVPIITHSNAHNNTGLEEQRIILMEE    |
| <i>SacPox</i>     | 125 | KGIQGTNNRAGFIKVAADEPGITRDVERAIRAAAIQKETNPVIITHSNAHNNTGLEQQRIILMEE     |
| <i>VmoLac</i>     | 125 | IGIQGTNTRAAFVKAVIDSSGLTKDVEMAIRAAAKAHIKTDVPIITHSFVGNKSSLDLIRIFKEE     |
| <i>GKL</i>        | 132 | EGIADTGKAGVIKLASSKGRITEYEKMFRAAARAQKETGAVIITHTQEGT-MGPEQAAYLLEH       |
| <i>Dr0930</i>     | 130 | EGIAGTGIRAGVIKLASSRDAITPYEQLFRAAARVQRETGVPIITHTQEGQ-QGPQQAELLTSL      |
|                   |     | * * * . * . . . * . * . . . . * . * . . .                             |
| <i>SsoPox3Mut</i> | 189 | GVDPGKILIGHLGDTDNIDYIKKIADKGSFIGLDRYGLD----LFLPVDKRNETTLRLIKDGYSD     |
| <i>SisLac</i>     | 189 | GVDPGKILIGHLGDTDNIDYIKKIADKGSFIGLDRYGLD----LFLPVDKRNETTLRLIKDGYSD     |
| <i>SacPox</i>     | 190 | GVDPGKILIGHLGDTDNIDYIKKIADKGSFIGLDRYGLD----LFLPIDKRNEVLLKLKIDGYLD     |
| <i>VmoLac</i>     | 190 | GVDLARTVIGHVGDTHDISFIEQILREGAFIGLDRFGLD----IYPLDKRVKTAIELIKRGWID      |
| <i>GKL</i>        | 196 | GADPKKIVIGHMCGNTDPDYHRKTLAYGVYIAFDRFGIQGMVG-APTDEERVRTLALLRDGYEK      |
| <i>Dr0930</i>     | 194 | GADPARIMIGHMDGNTDPAYHRETLRHGVSIAFDRIGLQGMVG-TPTDAERLSVLTTLLEGYAD      |
|                   |     | * . * * * . . * . . . * . * . * . *                                   |
| <i>SsoPox3Mut</i> | 250 | KIMISHDYLCFTD-AGTAKPEYKPKLAPRWSITLIFEDTIPFLKRNNGVNEEVIAITIFKENPKKFFS- |
| <i>SisLac</i>     | 250 | RIMISHDYCCTID-WGTARPELKPPLAPRWSMALIFEDTIPFLKKNVSEEVIDIIFKENPKKFFS-    |
| <i>SacPox</i>     | 251 | RIMVSQDYCCTID-WGIAKPEYKPKLAPKWSMSLIFTDVIPSIKRAAGTDEQLHVIFVKNPARLFS-   |
| <i>VmoLac</i>     | 251 | QLLLSHDYCPTID-WYP--PEVVRSTVPDWTMTLIFEKVIIPMRSEGITEEQINRVLIDNPRRLFTGR- |
| <i>GKL</i>        | 260 | QIMLSHDTVNVWLGRPFITPEPFAEMMNWVHVEHLFVNIIPALKNEGIRDEVLEQMFIGNPAALFSA-  |
| <i>Dr0930</i>     | 258 | RLLLSHDSIWHWLGRPPAIPAAALPAVKDWHPLHISDDILPDLRRRGITEEQVGQMTVGNPARLFG-   |
|                   |     | . . . . * . . . * . . . * . . . * . . . *                             |

**Figure S2.** Structure-based protein sequence alignment of 6 homologous PLL enzymes utilized in this study. Protein sequence alignment was performed using Swiss-pdb viewer 4.1.0, with manual improvement.

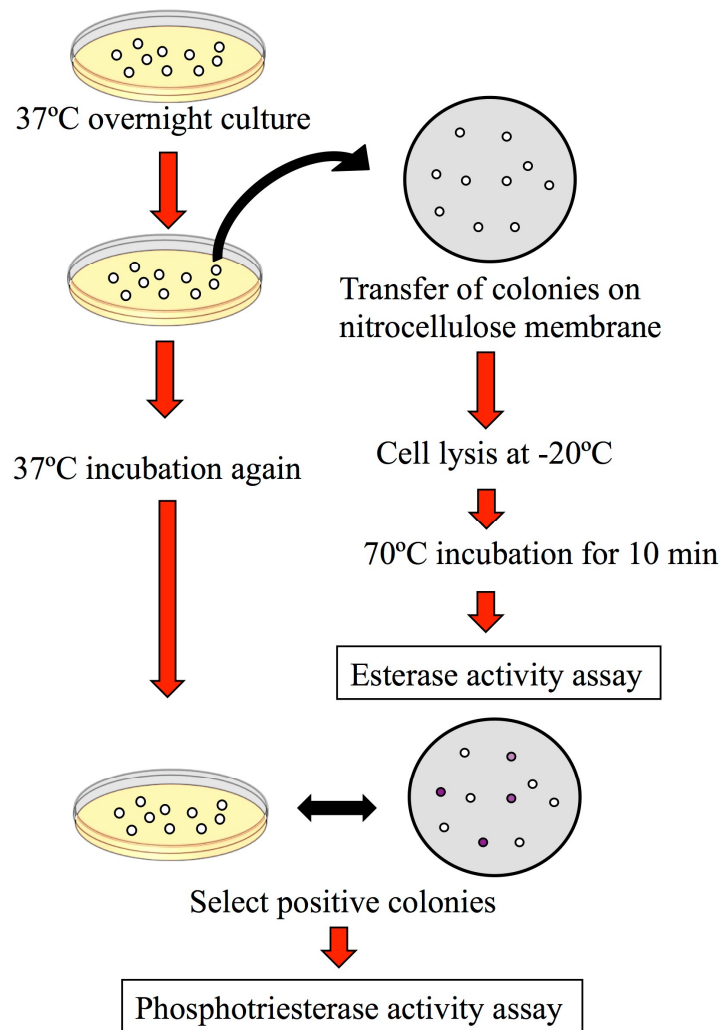

**Figure S3.** Scheme for the screening for PLL mutant library generated by DNA StEP using 6 homologous PLL genes. First, colonies expression mutant PLL enzymes were transferred to nitrocellulose membrane for *in situ* esterase assay. Secondly, cells were lysed by repeated incubations at  $-20^{\circ}\text{C}$  and room temperature. Esterases derived from mesophilic host were inactivated by incubation at  $70^{\circ}\text{C}$ . Subsequently, esterase activity assay was performed by incubating nitrocellulose membrane in the reaction solution prepared by mixing 10 mg  $\beta$ -naphthyl acetate in 500  $\mu\text{l}$  MeOH and 50 mg Fast Blue RR in 50 ml of 50 mM Tris-HCl (pH 8.5). After incubation for 10 min under gentle shaking, nitrocellulose membrane was washed with distilled water and air-dried. Significantly positive colonies were selected for secondary phosphotriesterase activity screening using paraoxon as substrate.

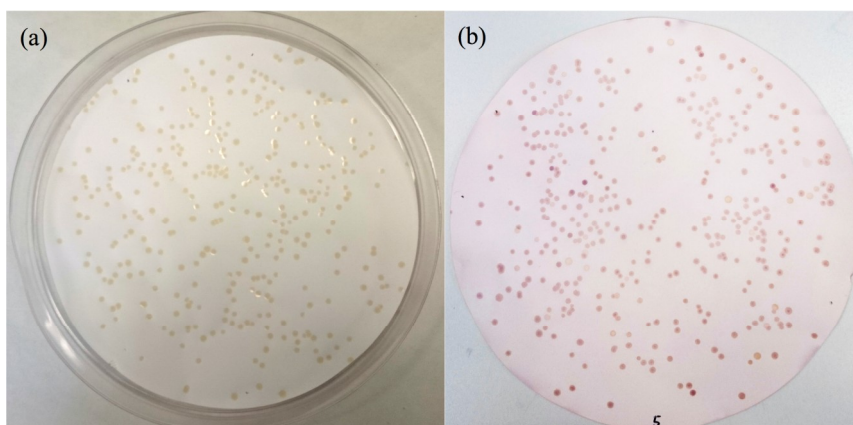

**Figure S4.** *In situ* esterase activity assay. (a) colonies transferred on nitrocellulose membrane for in situ assay. (b) shows nitrocellulose membrane after esterase activity assay. The intensity of violet color of each colony varies according to the esterase activity of the mutant enzyme expressed.

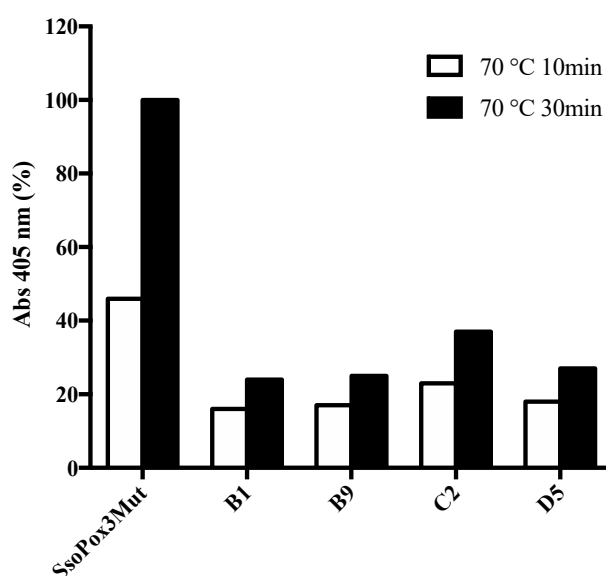

**Figure S5.** Comparison of paraoxonase activity with 3Mut and 4 variants. Generation of *p*-nitrophenol, the hydrolysis product of paraoxon, was detected by measuring absorbance at 405 nm. Data collection was performed at two time points (10 min and 30 min) after 70 °C incubation. The absorbance obtained at each measurement was converted in percentage by considering the value in SsoPox3Mut after 30 min incubation at 70 °C as 100%.

|                   |     |                                                                       |
|-------------------|-----|-----------------------------------------------------------------------|
| B1                | 1   | --MRIPLVGKEPIEAEDMGFTLIHEHLRVFSEAVRYQWPHLY-NEDEELRNAVNEVKRAMQFGVKTI   |
| B9                | 1   | --MRIPLVGKEPIEAEDMGFTLIHEHLRVFSEAVRQWPHLY-NEDEEFRNAVNEVKRAMQFGVKTI    |
| C2                | 1   | --MRIPLVGKDSIESKDIGFTLIHEHLRVFSEAVRQWPHLY-NEDEEFRNAVNEVKRAMQFGVKTI    |
| D5                | 1   | --MRIPLVGKEPIEAEDMGFTLIHEHLRVFSEAVRYQWPHLY-NEDEELRNAVNEVKRAMQFGVKTI   |
| <i>SsoPox3Mut</i> | 1   | --MRIPLVGKDSIESKDIGFTLIHEHLRVFSEAVRQWPHLY-NEDEEFRNAVNEVKRAMQFGVKTI    |
| <i>SisLac</i>     | 1   | --MRIPLVGKEPIEAEDMGFTLIHEHLRVFSEAVRYQWPHLY-NEDEELRNAVNEVKRAMQFGVKTI   |
| <i>SacPox</i>     | 1   | -MTKIPLVGKEISPGEIMGFTLIHEHLRVFSEPVRYQWPHLY-NEDEELKNAVNEVKTIMSYGVKTI   |
| <i>VmoLac</i>     | 1   | -MVRISIAGGNEIDPGSMGLTLFHEHLRLITEVVRWNWPHLY-NEDEELKRAIDAVNAAKKYGVKTI   |
| GKL               | 1   | MAEMVETVC-GPVPVEQLGKTLIHEHFLFGYPGFQGDVTRGTFREDESRLVAVEAAEKMKRHIQTV    |
| <i>Dr0930</i>     | 1   | --MTAQTVT-GAVAAAQLGATLPHEHVIFGYPGYAGDVTLGPFDHAAALASCTETARALLARGIQTV   |
|                   |     | . * * * * *                                                           |
| B1                | 65  | VDPTVMGLGRDIRFMEKVVKTGTGINLVAGTGIYIYID-LPFYFLNRS-----IDEIADLFIHDIK    |
| B9                | 65  | VDPTVMGLGRDIRFMEKVVKTGTGINLVAGTGIYIYID-LPFYFLNRS-----IDEIADLFIHDIK    |
| C2                | 65  | VDPTVMGLGRDIRFMEKVVKTGTGINLVAGTGIYIYID-LPFYFLNRS-----IDEIADLFIHDIK    |
| D5                | 65  | VDPTVMGLGRDIRFMEKVVKTGTGINLVAGTGIYIYVD-LPFYFLNRS-----IDEIADLFIHDIK    |
| <i>SsoPox3Mut</i> | 65  | VDPTVMGLGRDIRFMEKVVKTGTGINLVAGTGIYIYI-DLPFYFLNRS-----IDEIADLFIHDIK    |
| <i>SisLac</i>     | 65  | VDPTVMGLGRDIRFMEKVVKTGTGINLVAGTGIYIYV-DLPFYFLNRS-----IDEIADLFIHDIK    |
| <i>SacPox</i>     | 66  | VDPTVMGLGRDIRFSEKVVKETGINVIAATGLTYTYT-DLPFFFNRS-----LEEIAELLIHDIK     |
| <i>VmoLac</i>     | 66  | IDLTVAGIGCDVRFNEKVAATGVNIIMGTGFYTYTE-IPFYFKNRG-----IDSLVDAFVHDIT      |
| GKL               | 67  | VDPTPNDGCRNPAFLRRVAEETGLNIIICATGYEYEGEGAPPYFQFRLLGTAEDDIYDMFMAELT     |
| <i>Dr0930</i>     | 65  | VDATPNDGCRNPAFLREVSEATGLQILCATGFYEGEGATYFVKFRASLGDAESEIYEMMRTEVT      |
|                   |     | . * * * . * * * * . * . . . .                                         |
| B1                | 124 | EGIQGTNLKAGFVKIAADEPGITKDVEKVIIRAAAIANKETKVPIITHSNAHNNTGLEEQQRILTEE   |
| B9                | 124 | EGIQGTNLKAGFVKIAADEPGITKDVEKVIIRAAAIANKETKVPIITHSNAHNNTGLEEQQRILTEE   |
| C2                | 124 | EGIQGTNLKAGFVKIAADEPGITKDVEKVIIRAAAIANKETKVPIITHSNAHNNTGLEEQQRILTEE   |
| D5                | 124 | EGIQATSNKAGFVKIAADEPGITKDVEKVIIRAAAIHKEAKVPIITHSNAHNNTGLEEQQRILTEE    |
| <i>SsoPox3Mut</i> | 124 | EGIQGTNLKAGFVKIAADEPGITKDVEKVIIRAAAIANKETKVPIITHSNAHNNTGLEEQQRILTEE   |
| <i>SisLac</i>     | 124 | EGIQATSNKAGFVKIAADEPGITKDVEKVIIRAAAIHKEAKVPIITHSNAHNNTGLEEQQRILTEE    |
| <i>SacPox</i>     | 125 | KGIQGTNNRAGFIKVAADEPGITRDVERAIRAAAIQKETNVPIITHSNAHNNTGLEEQQRILTEE     |
| <i>VmoLac</i>     | 125 | IGIQGTNTRAAFVKAVIDSSGLTKDVEMAIRAAAKAHIKTDVPIITHSFVGNKSSDLIRIFKEE      |
| GKL               | 132 | EGIADTGIKAGVIKLASSKGRITEYEKMFRAAARAQKETGAVIITHTQEGT-MGPEQAAYLLEH      |
| <i>Dr0930</i>     | 130 | EGIAGTGIRAGVIKLASSRDAITPYEQLFRAAARVQRETGVPIITHTQEGQ-QGPPQAELLTSL      |
|                   |     | ** * . * . . * * . . . . * . . . .                                    |
| B1                | 189 | GVDPGKILIGHLGDTDNIDYIKKIADKGSFIGLDRYGLD----LFLPVDKRNETTTLKLIKDGYS     |
| B9                | 189 | GVDPGKILIGHLGDTDNIDYIKKIADKGSFIGLDRYGLD----LFLPVDKRNETTTLKLIKDGYS     |
| C2                | 189 | GVDPGKILIGHLGDTDNIDYIKKIADKGSFIGLDRYGLD----LFLPVDKRNETTTLKLIKDGYS     |
| D5                | 189 | GVDPGKILIGHLGDTDNIDYIKKIADKGSFIGLDRYGLD----LFLPVDKRNETTTLKLIKDGYS     |
| <i>SsoPox3Mut</i> | 189 | GVDPGKILIGHLGDTDNIDYIKKIADKGSFIGLDRYGLD----LFLPVDKRNETTTLRLIKDGYS     |
| <i>SisLac</i>     | 189 | GVDPGKILIGHLGDTDNIDYIKKIADKGSFIGLDRYGLD----LFLPVDKRNETTTLKLIKDGYS     |
| <i>SacPox</i>     | 190 | GVDPGRVLIGHLGDTDNVDYIKKIADKGSFVGLDRYGLD----LFLPIDKRNEVLLKLIKDGYS      |
| <i>VmoLac</i>     | 190 | GVDLARTVIGHVGDITDIDISFIEQILREGAFIGLDRFGLD----IYLPVDKRVKTAIELIKRGWID   |
| GKL               | 196 | GADPKKIVIGHMCGNTDPDYHRKTLAYGVYIAFDRFGIQGMVG-APTDEERVTTLLALLRDGYEK     |
| <i>Dr0930</i>     | 194 | GADPARIMIGHMCGNTDPAYHRETLRHGVSIAFDRIGLQGMVG-TPTDAERLSVLTLLGEGYAD      |
|                   |     | * . * * * . . * . . . * . * * . *                                     |
| B1                | 250 | RIMISHDYCCTID-WGTARPELKPKLAPRWSMALIFEDTIPFLKKNVSEEVIDIN----PKKFFS     |
| B9                | 250 | RIMISHDYCCTID-WGTARPELKPKLAPRWSMALIFEDTIPFLKKNVSEEVIDI----PKKFFS      |
| C2                | 250 | RIMISHDYCCTID-WGTARPELKPKLAPRWSMALIFEDTIPFLKKNVSEEVIDIKFIEIPKKFFS     |
| D5                | 250 | RIMISHDYCCTID-WGTARPELKPKLAPRWSMALIFEDTIPFLKKNVSEEVIDINARRIPKKFFS     |
| <i>SsoPox3Mut</i> | 250 | KIMISHDYLCFTD-AGTAKPEYKPKLAPRWSITLIFEDTIPFLKKNVNEEVIAITFKENPKKFFS-    |
| <i>SisLac</i>     | 250 | RIMISHDYCCTID-WGTARPELKPKLAPRWSMALIFEDTIPFLKKNVSEEVIDIIFKENPKKFFS-    |
| <i>SacPox</i>     | 251 | RIMVSQDYCCTID-WGIAKPEYKPKLAPKWSMISLIFTDVIPSIKRAGVTDEQLHVIFVKNPARLFS-  |
| <i>VmoLac</i>     | 251 | QLLLSHDYCPTID-WYP--PEVVRSTVPDWTMTLIFEKVIPRMRSEGITEEQINRVLIDNPRRLFTGR- |
| GKL               | 260 | QIMLSHDTVNVWGRPFITLPEPFAEMMKNWVHEHLFVNIIIPALKNEGIVQMFIGNPAALFSA-      |
| <i>Dr0930</i>     | 258 | RLLLSHDSIHWHLGRPPAIPAALPAVKDWHPLHISDDILPDLRRRGITEEQVGMQTVGNPARLFG-    |
|                   |     | . . . * . * . . * . * . . * . *                                       |

**Figure S6.** Structure-based sequence alignment between 4 variants and 6 template PLL genes. Protein sequence alignment was performed using Swiss-Pdb viewer 4.1.0, with manual improvement.

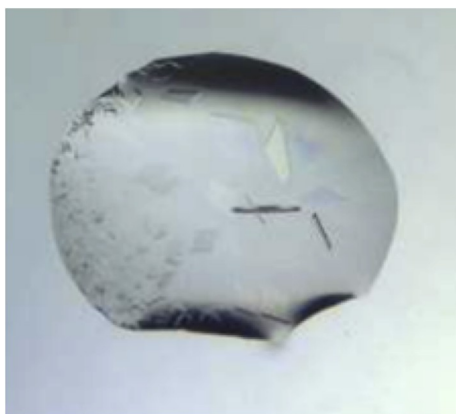

**Figure S7.** A representative crystal of SsoPox4Mut from which the structure was obtained.

**Table S1.** Sequence identities at DNA levels between 6 homologous PLL genes utilized in this study.

| (%)               | <i>SsoPox3Mut</i> | <i>SisLac</i> | <i>SacPox</i> | <i>VmoLac</i> | GKL  | Dr0930 |
|-------------------|-------------------|---------------|---------------|---------------|------|--------|
| <i>SsoPox3Mut</i> | 100               | 86,8          | 70,7          | 55,7          | 46,7 | 42,6   |
| <i>SisLac</i>     | 86,8              | 100           | 72,3          | 55,3          | 48,4 | 42,6   |
| <i>SacPox</i>     | 70,7              | 72,3          | 100           | 55,5          | 47,2 | 44,3   |
| <i>VmoLac</i>     | 55,7              | 55,3          | 55,5          | 100           | 47,4 | 47,2   |
| GKL               | 46,7              | 48,4          | 47,2          | 47,4          | 100  | 62,9   |
| Dr0930            | 42,6              | 42,6          | 44,3          | 47,2          | 62,9 | 100    |

**Table S2.** Sequence identities at protein levels between 6 homologous PLL enzymes utilized in this study

| (%)               | <i>SsoPox3Mut</i> | <i>SisLac</i> | <i>SacPox</i> | <i>VmoLac</i> | GKL  | Dr0930 |
|-------------------|-------------------|---------------|---------------|---------------|------|--------|
| <i>SsoPox3Mut</i> | 100               | 90,5          | 75,2          | 51,9          | 35,8 | 29,9   |
| <i>SisLac</i>     | 90,5              | 100           | 76,1          | 52,2          | 35,8 | 28,9   |
| <i>SacPox</i>     | 75,2              | 76,1          | 100           | 52,7          | 35,0 | 32,7   |
| <i>VmoLac</i>     | 51,9              | 52,2          | 52,7          | 100           | 31,6 | 31,3   |
| GKL               | 35,8              | 35,8          | 35,0          | 31,6          | 100  | 59,1   |
| Dr0930            | 29,9              | 28,9          | 32,7          | 31,3          | 59,1 | 100    |

**Table S3.** Sequence identities between 4 variants and template PLL genes used in DNA StEP at protein level.

| (%)               | B1    | B9    | C2    | D5    |
|-------------------|-------|-------|-------|-------|
| B1                | 100,0 | 98,7  | 96,1  | 97,1  |
| B9                | 98,7  | 100,0 | 97,4  | 96,5  |
| C2                | 96,1  | 97,4  | 100,0 | 94,0  |
| D5                | 97,1  | 96,5  | 94,0  | 100,0 |
| <i>SsoPox3Mut</i> | 93,2  | 93,9  | 94,0  | 89,2  |
| <i>SisLac</i>     | 97,1  | 95,8  | 94,6  | 98,1  |
| <i>SacPox</i>     | 77,4  | 76,5  | 75,5  | 75,2  |
| <i>VmoLac</i>     | 53,9  | 53,6  | 52,7  | 52,2  |
| GKL               | 36,7  | 36,0  | 35,3  | 34,9  |
| Dr0930            | 30,9  | 30,6  | 29,3  | 28,9  |
